# Supplementary material for: Activated protein C signaling mediates neuroinflammation in seizure induced by pilocarpine
Source: PubMed Central journal article supplement — Biochem Biophys Rep. 2023 Sep 29;35:101550. doi: 10.1016/j.bbrep.2023.101550 (PMC10562752; doi:10.1016/j.bbrep.2023.101550), 2023-09-29
Supplement: mmc1.pdf [file mmc1.pdf]

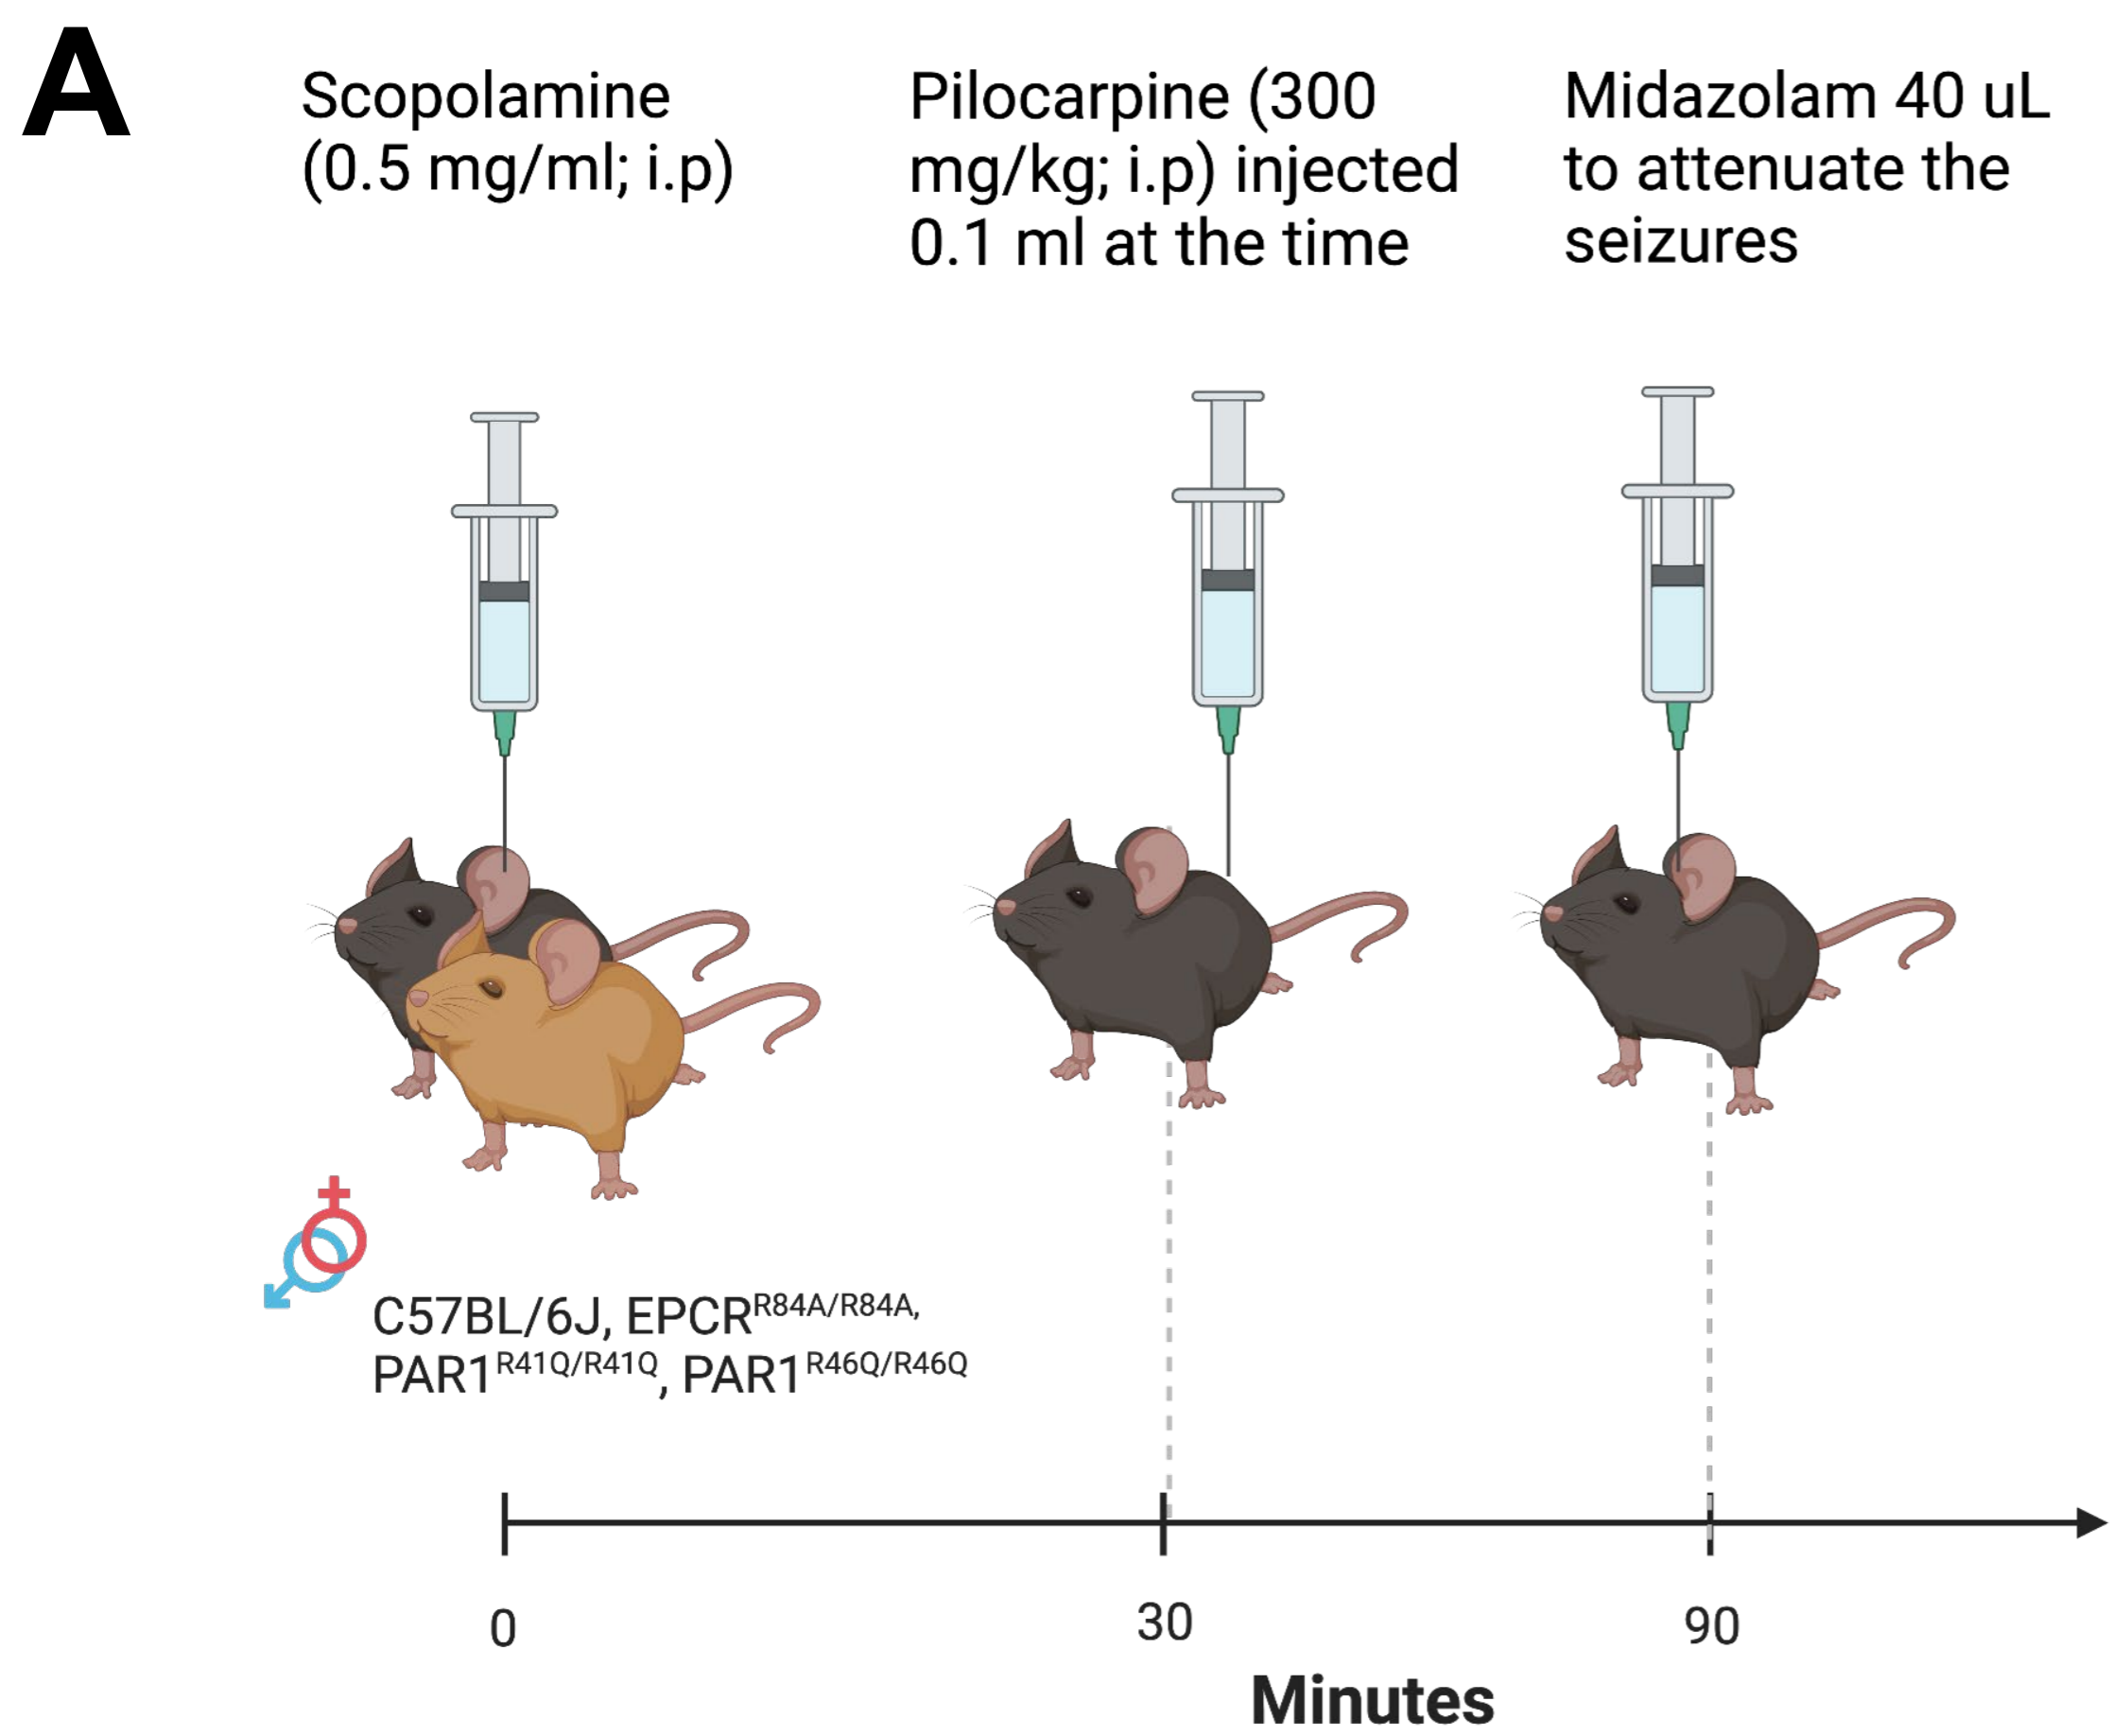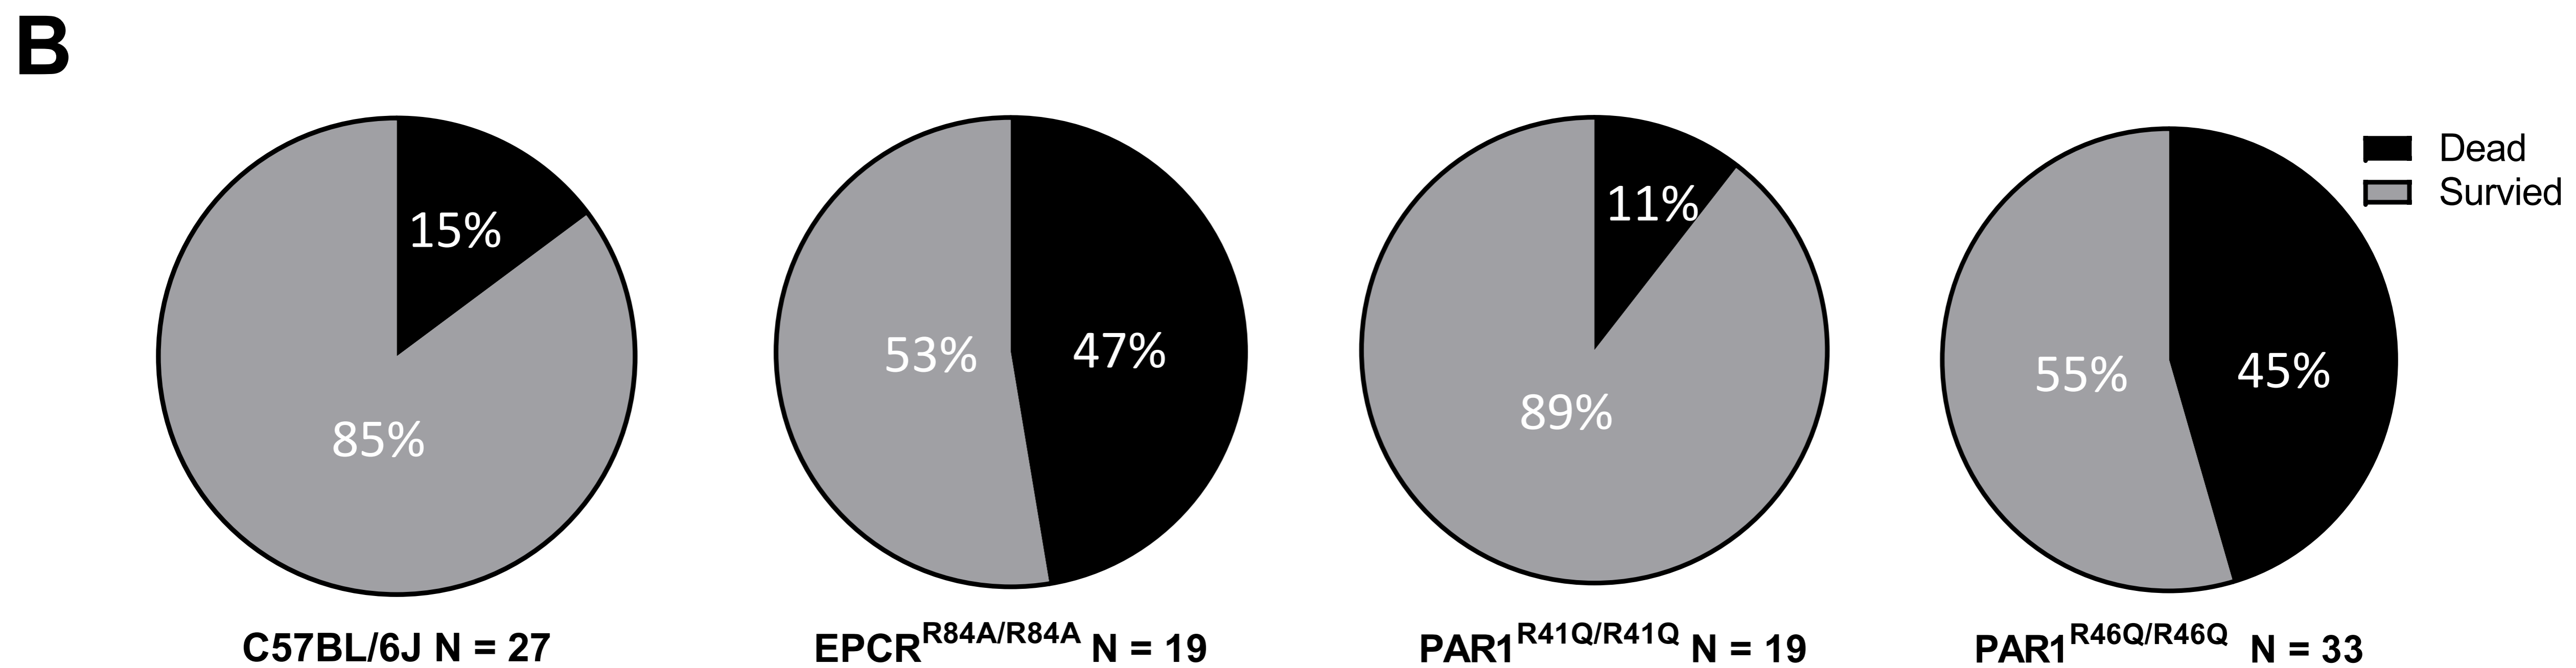

**Supplementary Data 1: Pilocarpine induced Seizure model. A.** Mechanisms of seizure induction in mouse both male and female (12-18 months). Figure Created with Biorender. **B.** Proportion of survival. Percentage of animal that survived or died the hour after pilocarpine injection.
